# Supplementary material
Source: PubMed Central journal article supplement (PMC8578457)
Supplement: NIHMS1745060-supplement-Supplemental_Material.pdf [file NIHMS1745060-supplement-Supplemental_Material.pdf]

## SUPPLEMENTAL MATERIAL

### Supplemental Methods

#### Addressing loss to follow-up (*Text I*)

Of the 856 participants without cardiomyopathy at baseline visit, 285 (33.3%) did not return for the follow-up visit; 108 (28.1%) were seropositives and 177 (37.6%) were seronegative blood donors. To assess whether some patients may not have returned because they died, we linked each participant lost to follow-up with the National Mortality System (SIM) to determine mortality. For participants who were alive, our strategy for dealing with loss to follow-up on prediction of new-onset of cardiomyopathy was to compare all characteristics of the subjects deemed lost with those who participated in follow-up visit (Table III in the Data Supplement). There was a higher loss-to follow-up in São Paulo compared with Montes Claros among seropositive subjects. In seronegative subjects younger participants were more frequently lost to follow-up (Figure I in the Data Supplement). The model to predict loss to follow-up is shown in Table IV in the Data Supplement. The variables that predicted either loss to follow-up or new-onset cardiomyopathy were included in the final models shown in Table 5. The inclusion of these auxiliary variables in the maximum likelihood analyses considerably enhanced the missing at random (MAR) assumption.

Additionally, a sensitivity analysis for new-onset cardiomyopathy using inverse probability weights for selection was performed. The weights were obtained from the logistic model in Supplementary Table IV using all variables found to be significantly associated with loss to follow-up. The weighted analysis was done using the *svyglm* function from the R package *survey*. A Table with sensitivity analysis is presented in Table V in the Data Supplement with no important changes in the results.

## Supplemental Tables

**Table I:** Association between anti-*T. cruzi* antibody levels and mortality

| Study group                      | Person-time at risk<br>(person-years) | Number of<br>deaths | Mortality per 1000<br>person-years (95% CI) |
|----------------------------------|---------------------------------------|---------------------|---------------------------------------------|
| Seronegative donors              | 4,976                                 | 18                  | 3.6 (2.1 – 5.7)                             |
| Seropositive donors (< 5)        | 1,108                                 | 4                   | 3.6 (1.0 – 9.2)                             |
| Seropositive donors (5-5.9)      | 1,094                                 | 5                   | 4.6 (1.5 – 10.7)                            |
| Seropositive donors (6-6.9)      | 1,773                                 | 10                  | 5.6 (2.7 – 10.4)                            |
| Seropositive donors ( $\geq 7$ ) | 1,214                                 | 13                  | 10.7 (5.7 – 18.3)                           |

Anti-*T. cruzi* antibody levels at baseline (EIA); 3 patients with missing data on antibody level).

**Table II:** Cardiomyopathy by antibody level category among seropositive blood donors at baseline visit.

| EIA category | Cardiomyopathy<br>(n=111)* | Without cardiomyopathy<br>(n=385) | Proportion of<br>cardiomyopathy at<br>baseline visit (%) |
|--------------|----------------------------|-----------------------------------|----------------------------------------------------------|
| < 3          | 0                          | 28                                | 0                                                        |
| 3 – 3.9      | 4                          | 24                                | 14                                                       |
| 4 – 4.9      | 7                          | 42                                | 14                                                       |
| 5 – 5.9      | 21                         | 84                                | 20                                                       |
| 6 – 6.9      | 39                         | 129                               | 23                                                       |
| $\geq 7$     | 40                         | 78                                | 34                                                       |

\* 3 patients with missing data on antibody level.

**Table III:** Baseline characteristics (visit 1) of participants lost to follow-up compared with those who participated in follow-up visit.

|                                           |               | Participants<br>(n=539) | Lost to follow-up*<br>(n=285) | P value |
|-------------------------------------------|---------------|-------------------------|-------------------------------|---------|
| Age, years                                |               | 49 (42-57)              | 47 (38-56)                    | 0.024   |
| Male sex                                  |               | 251 (46.6)              | 148 (51.9)                    | 0.143   |
| Anti- <i>T. cruzi</i><br>serological test | Positive      | 262 (48.6%)             | 108 (37.9%)                   | 0.002   |
|                                           | Negative      | 277 (51.4)              | 177 (62.1)                    |         |
| Centers (cities)                          | Montes Claros | 295 (54.7)              | 124 (43.5)                    | 0.002   |
|                                           | São Paulo     | 244 (45.3)              | 161 (56.5)                    |         |
| BMI, kg/m <sup>2</sup>                    |               | 26.7 (24.4 - 29.4)      | 26.8 (24.0 - 30.0)            | 0.922   |
| NYHA<br>functional class                  | I             | 512 (95.0)              | 272 (95.3)                    | 0.973   |
|                                           | II/III        | 27 (5.0)                | 13 (4.7)                      |         |
| Smoking<br>history                        | Never         | 308 (57.1)              | 154 (54.0)                    | 0.596   |
|                                           | Past          | 165 (30.6)              | 90 (31.6)                     |         |
|                                           | Current       | 66 (12.2)               | 41 (14.4)                     |         |
| Diabetes                                  |               | 29 (5.4)                | 11 (3.9)                      | 0.246   |
| Hypertension                              |               | 125 (23.2)              | 70 (24.6)                     | 0.449   |
| Chronic kidney disease                    |               | 12 (2.2)                | 12 (4.2)                      | 0.254   |
| Heart rate (bpm)                          |               | 68 (60-72)              | 68 (60-72)                    | 0.088   |
| Systolic blood pressure (mmHg)            |               | 125 (113-140)           | 125 (115-140)                 | 0.655   |
| Diastolic blood pressure (mmHg)           |               | 75 (65-86)              | 80 (69-89)                    | 0.033   |
| <b>Laboratory measurements</b>            |               |                         |                               |         |
| Low-density lipoprotein, mg/dL)           |               | 122 (96-149)            | 123 (101-148)                 | 0.962   |
| High-density lipoprotein, mg/dL           |               | 47 (40-56)              | 47 (39-56)                    | 0.859   |
| Triglycerides, mg/dL                      |               | 118 (86-171)            | 122 (87-179)                  | 0.507   |
| Glycemia, mg/dL                           |               | 87 (81 - 96)            | 86 (79 - 96)                  | 0.628   |

|                                       |                    |                    |       |
|---------------------------------------|--------------------|--------------------|-------|
| NT-ProBNP, pg/mL                      | 38.0 (22.7 - 65.2) | 40.1 (23.3 - 65.5) | 0.596 |
| <b>Medications</b>                    |                    |                    |       |
| Amiodarone                            | 2 (0.4)            | 2 (0.7)            | 0.516 |
| ACE inhibitors                        | 52 (9.6)           | 25 (8.8)           | 0.681 |
| Beta blockers†                        | 25 (4.6)           | 19 (6.7)           | 0.218 |
| Antiplatelet‡                         | 19 (3.5)           | 5 (1.8)            | 0.151 |
| Benznidazole                          | 26 (4.8)           | 12 (4.2)           | 0.690 |
| <b>ECG and echocardiographic data</b> |                    |                    |       |
| QRS duration (ms)                     | 88 (82 - 94)       | 88 (82 - 94)       | 0.987 |
| PR duration (ms)                      | 156 (142 - 168)    | 156 (142 - 170)    | 0.736 |
| QTc calculated (ms)                   | 426 (411 - 441)    | 424 (405 - 441)    | 0.149 |
| Low QRS amplitude                     | 17 (3.2)           | 7 (2.5)            | 0.571 |
| Sinus bradycardia $\geq 40$ bpm       | 163 (30.4)         | 87 (30.6)          | 0.947 |
| Minor isolated ST-T abnormalities     | 57 (10.6)          | 23 (9.7)           | 0.248 |
| LV ejection fraction (%)              | 63 (60 - 65)       | 63 (60 - 65)       | 0.509 |
| LV mass, g/m <sup>2</sup>             | 78 (65 - 89)       | 77 (65 - 89)       | 0.716 |
| LA volume, mL/m <sup>2</sup>          | 27 (24- 33)        | 27 (23 - 32)       | 0.236 |
| E/e' ratio                            | 6 (5 - 8)          | 6 (5 - 7)          | 0.098 |

\*Participants who were alive but did not return for cardiovascular assessment at visit 2.

† Beta blockers included atenolol, propranolol and carvedilol.

‡ Only aspirin was used.

ACE inhibitors = angiotensin-converting-enzyme inhibitors

**Table IV:** Multivariable model to predict loss to follow-up

| Variables                      | Betas   | OR (95% CI )          | P value               |       |
|--------------------------------|---------|-----------------------|-----------------------|-------|
| Age, years                     | -0.032  | 0.969 (0.952 - 0.985) | 0.001                 |       |
| Female sex                     | -0.131  | 0.877 (0.642 - 1.198) | 0.410                 |       |
| Center (São Paulo)             | 0.458   | 1.581 (1.154 - 2.172) | 0.004                 |       |
| <i>T. cruzi</i> -seropositives | -0.431  | 0.650 (0.479 - 0.879) | 0.005                 |       |
| Obesity                        | 0.154   | 1.167 (0.813 - 1.667) | 0.399                 |       |
| Dyslipidemia                   | -0.051  | 0.950 (0.697 - 1.294) | 0.747                 |       |
| Diabetes                       | -0.444  | 0.641 (0.291 - 1.322) | 0.246                 |       |
| Hypertension                   | 0.293   | 1.340 (0.910 - 1.968) | 0.136                 |       |
| Smoking history                | Current | 0.041                 | 1.041 (0.658 - 1.629) | 0.860 |
|                                | Past    | 0.071                 | 1.074 (0.761 - 1.511) | 0.684 |

**Table V:** Predictors of new-onset cardiomyopathy or death at long-term follow-up (sensitivity analysis using inverse probability weights for selection)

| Disease status at follow-up                                                   | Did not progress<br>(n = 496) | Progressed<br>(n = 75) | Unadjusted         |                    | Adjusted for age and sex |                    | Adjusted for age and sex, and risk factors* |                    |
|-------------------------------------------------------------------------------|-------------------------------|------------------------|--------------------|--------------------|--------------------------|--------------------|---------------------------------------------|--------------------|
|                                                                               |                               |                        | OR (95% CI)        | P value            | OR (95% CI)              | P value            | OR (95% CI)                                 | P value            |
| <b>Overall participants without cardiomyopathy at baseline visit</b>          |                               |                        |                    |                    |                          |                    |                                             |                    |
| Male sex                                                                      | 227 (45.8)                    | 43 (57.3)              | 1.61 (0.97-2.69)   | 0.066              | 1.78 (1.06-2.99)         | 0.030              | 1.86 (1.10 - 3.15)                          | 0.022              |
| Age, years                                                                    | 49 (42-56)                    | 53 (44-61)             | 1.04 (1.01-1.07)   | 0.009              | 1.04 (1.01-1.07)         | 0.004              | 1.05 (1.02-1.08)                            | 0.003              |
| <i>T. cruzi</i> serological test                                              |                               |                        |                    |                    |                          |                    |                                             |                    |
| Negative                                                                      | 266 (53.6)                    | 28 (37.3)              | Reference          |                    | Reference                |                    | Reference                                   |                    |
| Positive                                                                      | 230 (46.4)                    | 47 (62.7)              | 1.97 (1.18 - 3.29) | 0.010              | 2.28 (1.36 - 3.81)       | 0.002              | 2.30 (1.37-3.87)                            | 0.002              |
| Centers                                                                       | MOC                           | 274 (55.2)             | 30 (40.0)          | Reference          |                          | Reference          |                                             | Reference          |
|                                                                               | SP                            | 222 (44.8)             | 45 (60.0)          | 1.66 (1.00 - 2.76) | 0.050                    | 1.28 (0.74 - 2.22) | 0.373                                       | 1.28 (0.73 - 2.23) |
| <b><i>T. cruzi</i> seropositives without cardiomyopathy at baseline visit</b> |                               |                        |                    |                    |                          |                    |                                             |                    |
|                                                                               | (n=230)                       | (n=47)                 |                    |                    |                          |                    |                                             |                    |
| Male sex                                                                      | 99 (43.0)                     | 26 (55.3)              | 1.73 (0.90-3.32)   | 0.101              | 1.88 (0.96-3.65)         | 0.065              | 2.05 (1.03-4.07)                            | 0.041              |
| Age, years                                                                    | 48 (41-56)                    | 50 (41-59)             | 1.02 (0.99-1.06)   | 0.172              | 1.03 (0.99-1.07)         | 0.109              | 1.04 (1.00-1.06)                            | 0.075              |
| Benznidazole use†                                                             | 23 (10.0)                     | 5 (10.6)               | 0.88 (0.31-2.47)   | 0.808              | 1.07 (0.37-3.04)         | 0.905              | 1.05 (0.35-3.12)                            | 0.932              |
| <i>T. cruzi</i> DNA detected by PCR                                           |                               |                        |                    |                    |                          |                    |                                             |                    |
| Negative                                                                      | 129 (56.1)                    | 23 (48.9)              | Reference          |                    | Reference                |                    | Reference                                   |                    |

|                                  |                 |               |               |                    |       |                  |       |                   |       |
|----------------------------------|-----------------|---------------|---------------|--------------------|-------|------------------|-------|-------------------|-------|
| Positive                         |                 | 101 (43.9)    | 24 (51.1)     | 1.20 (0.62-2.86)   | 0.594 | 1.16 (0.60-2.24) | 0.653 | 1.16 (0.60- 2.24) | 0.666 |
| Centers                          | MOC             | 123 (53.5)    | 23 (48.9)     | Reference          |       | Reference        |       | Reference         |       |
|                                  | SP              | 107 (46.5)    | 24 (51.1)     | 1.20 (0.64 - 2.25) | 0.570 | 0.88 (0.43-1.81) | 0.739 | 0.86 (0.42-1.77)  | 0.687 |
| Antibody against <i>T. cruzi</i> |                 |               |               |                    |       |                  |       |                   |       |
| EIA (S/C)                        |                 | 6.1 (4.8-6.8) | 6.5 (5.2-7.3) | 1.28 (0.98-1.68)   | 0.068 | 1.32 (1.00-1.74) | 0.049 | 1.32 (1.00-1.75)  | 0.051 |
| Antibody                         | 1 <sup>st</sup> | 72 (31.3)     | 10 (21.3)     | Reference          |       | Reference        |       | Reference         |       |
| EIA                              | 2 <sup>nd</sup> | 60 (26.1)     | 12 (25.5)     | 1.27 (0.50-3.24)   | 0.619 | 1.22 (0.46-3.24) | 0.695 | 1.29 (0.48-3.51)  | 0.613 |
| quartiles                        | 3 <sup>rd</sup> | 58 (25.2)     | 9 (19.1)      | 1.14 (0.42-3.09)   | 0.797 | 1.17 (0.44-3.08) | 0.759 | 1.06 (0.40-2.83)  | 0.911 |
|                                  | 4 <sup>th</sup> | 40 (17.4)     | 16 (34.0)     | 2.46 (0.99-6.11)   | 0.053 | 2.73 (1.07-6.95) | 0.033 | 2.87 (1.08-7.63)  | 0.035 |

Data are expressed as the absolute numbers (percentage) or median (interquartile range-IQR)

\*Risk factors: Diabetes, hypertension, dyslipidemia, and body mass index. S/C: absorbance/cut off

† Benznidazole was the antitrypanosomal medication

Abbreviations: MOC: Montes Claros; SP: São Paulo

## Supplemental Figures and Figure Legends

### Figure I

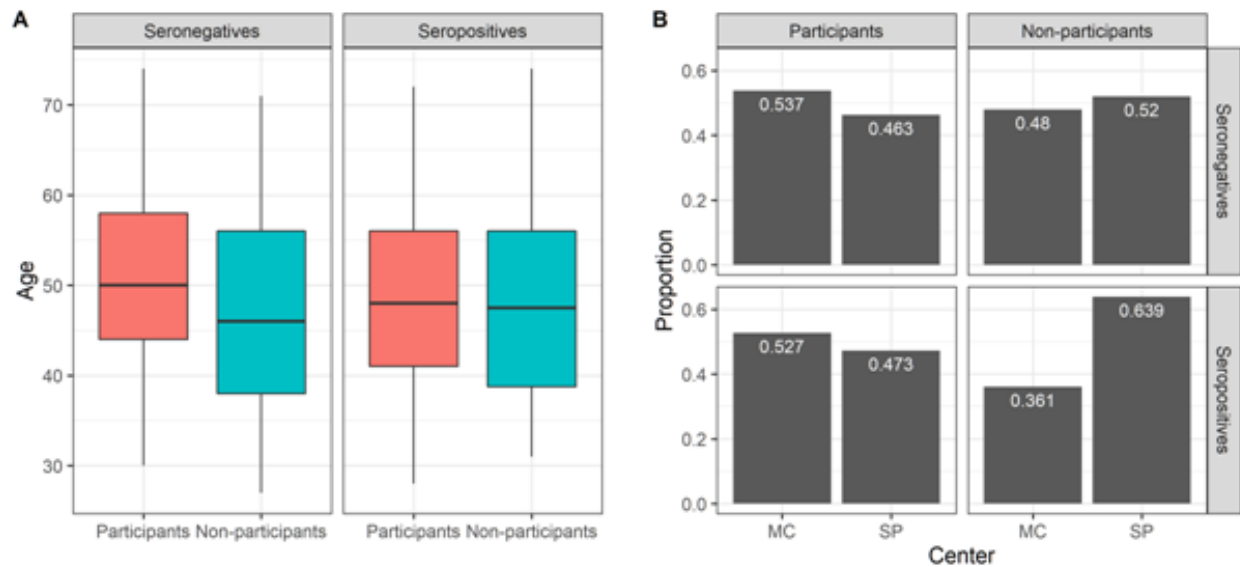

**Figure I:** Differences of serological status according to age at enrollment (panel A), and the center of recruitment (panel B) between participants and non-participants at follow-up visit.

In seronegative participants, younger individuals were more frequently lost to follow-up. There was a higher loss-to follow-up in São Paulo compared with Montes Claros among seropositive participants.

MC = Montes Claros

SP = São Paulo
